# Supplementary material for: Novel radiation-activated N -oxide prodrugs for highly selective and synergistic tumor therapy to promote DNA damage and the ATM/ATR pathway
Source: Royal Society of Chemistry journal article supplement (doi:10.1039/d5cc06629h), 2026-01-01
Supplement: d5cc06629h1.pdf [file d5cc06629h1.pdf]

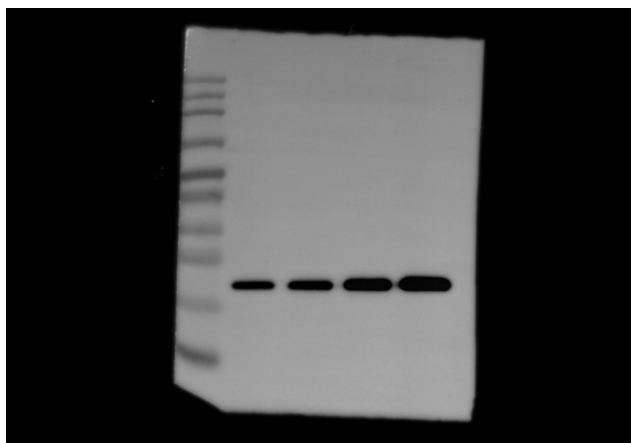

This is the complete uncropped gel and blot image of  $\gamma$ -H2AX, showing from left to right: PBS, PBS + X-ray, NOS, NOS + X-ray.

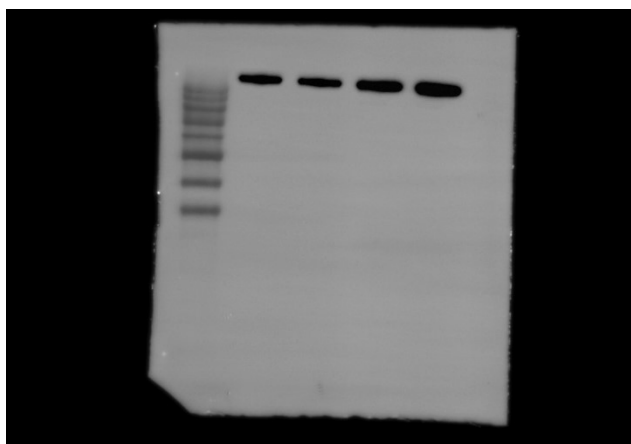

This is the complete uncropped gel and blot image of P-ATM.

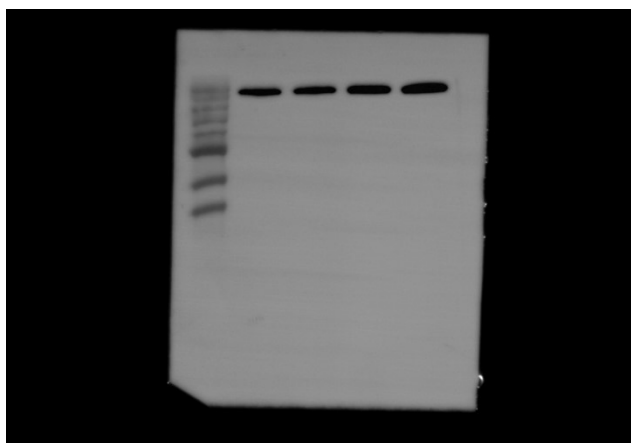

This is the complete uncropped gel and blot image of P-ATR.

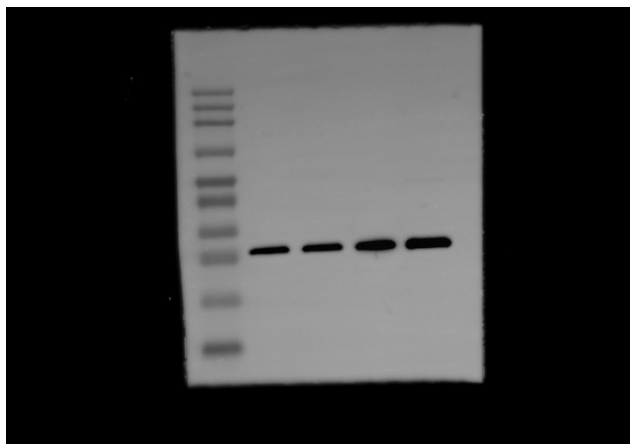

This is the complete uncropped gel and blot image of BAX.

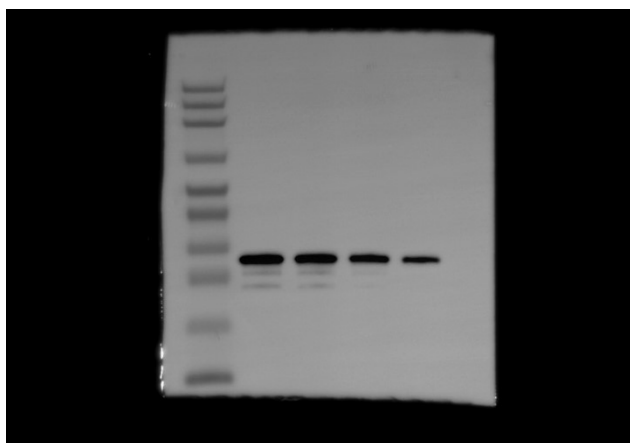

This is the complete uncropped gel and blot image of Bcl-2.

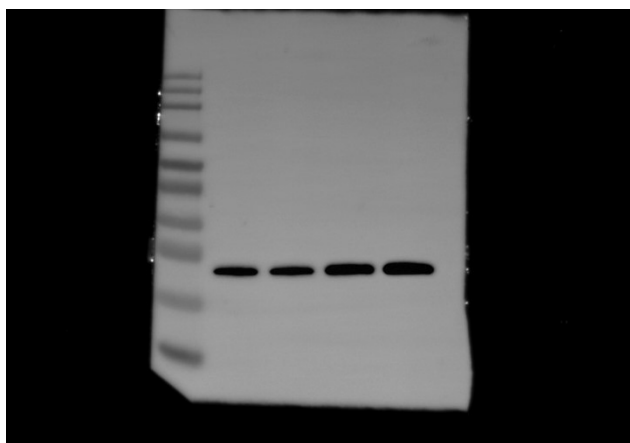

This is the complete uncropped gel and blot image of C-Caspase-3.
